# Supplementary material for: Heavy Metal Stress-Associated Proteins in Rice and Arabidopsis: Genome-Wide Identification, Phylogenetics, Duplication, and Expression Profiles Analysis
Source: Front Genet. 2020 May 8;11:477. doi: 10.3389/fgene.2020.00477 (PMC7225358; doi:10.3389/fgene.2020.00477)
Supplement: Table S3 — Synteny rice HMP gene pairs and Ka/Ks ratios. [file Table_3.XLSX]

## Sheet: Os_Segmental_duplications
Supplementary Table 3. Synteny rice HMP gene pairs and Ka/Ks ratios
OsHMP_ID	OsHMP_ID	Ka	Ks	Ka/Ks	Selection pressure
Os01t0595201	Os01t0719600	1.26554	0.84125	1.50436	Positive selection
Os01t0719600	Os05t0534500	0.636254	1.12541	0.565353	Purifying selection
Os01t0933200	Os05t0368600	0.42354	1.12052	0.377984	Purifying selection
Os01t0933200	Os07t0671400	0.28963	1.50265	0.192746	Purifying selection
Os02t0510600	Os04t0390100	1.00161	0.996413	1.00521	Positive selection
Os02t0819000	Os03t0152000	0.628515	1.94343	0.323406	Purifying selection
Os03t0120400	Os10t0537400	1.41852	0.824214	1.72106	Positive selection

## Sheet: Os_Bd
OsHMP_ID	BdHMP_ID	Ka	Ks	Ka/Ks	Selection pressure
Os01t0595201	KQK08565	0.622543	3.43536	0.181216	Purifying selection
Os01t0719600	KQK09505	0.876556	1.76575	0.49642	Purifying selection
Os01t0758000	KQK09822	1.44789	0.965423	1.49975	Positive selection
Os01t0826000	KQK10384	0.252455	4.45455	0.0566735	Purifying selection
Os01t0933200	KQK11376	0.696455	1.97858	0.351998	Purifying selection
Os01t0976300	KQK11823	1.25787	2.78979	0.450885	Purifying selection
Os01t0125600	KQK02498	0.187587	1.99435	0.0940597	Purifying selection
Os10t0440500	KQJ96875	0.845245	0.71405	1.18373	Positive selection
Os11t0147500	KQJ92327	0.484406	3.28724	0.147359	Purifying selection
Os12t0144600	KQJ92327	0.872425	3.93453	0.221735	Purifying selection
Os02t0172600	KQJ93558	0.475852	3.92345	0.121284	Purifying selection
Os02t0196600	KQJ93861	1.85368	0.914584	2.02681	Positive selection
Os02t0819000	KQK01380	0.584126	3.75787	0.155441	Purifying selection
Os02t0510600	PNT68676	0.942542	3.74125	0.251933	Purifying selection
Os02t0530100	KQJ99712	0.924272	3.45778	0.267302	Purifying selection
Os03t0120400	KQK23934	0.847423	3.71523	0.228095	Purifying selection
Os03t0152000	PNT78181	0.697453	4.82525	0.144542	Purifying selection
Os03t0178100	KQK23343	0.407782	3.52872	0.115561	Purifying selection
Os03t0383900	KQK21477	0.875755	3.92457	0.223147	Purifying selection
Os03t0819400	KQK12453	1.12577	0.910254	1.23677	Positive selection
Os03t0861400	KQK11941	0.848474	1.24842	0.679641	Purifying selection
Os04t0556000	KQJ83984	0.562948	2.10542	0.267381	Purifying selection
Os04t0590100	KQJ84294	0.488522	2.69841	0.181041	Purifying selection
Os04t0661100	KQJ85103	1.26584	0.966654	1.30951	Positive selection
Os04t0390100	KQJ82290	0.489982	3.69514	0.132602	Purifying selection
Os04t0244800	KQJ81970	0.505184	2.10959	0.23947	Purifying selection
Os05t0534500	KQK05217	0.691482	3.69412	0.187185	Purifying selection
Os06t0665800	KQK17019	0.399584	2.65948	0.150249	Purifying selection
Os06t0665800	KQJ93558	0.484942	3.69485	0.131248	Purifying selection
Os07t0232900	KQK20301	0.814485	2.95486	0.275643	Purifying selection
Os07t0671400	KQK14710	0.594122	1.36951	0.43382	Purifying selection
Os08t0405700	KQJ98211	1.12545	0.879541	1.27959	Positive selection
Os08t0403300	KQJ98168	0.618416	1.95262	0.316711	Purifying selection
Os09t0549600	PNT65087	0.694411	2.69114	0.258036	Purifying selection

## Sheet: Os_Ob
OsHMP_ID	ObHMP_ID	Ka	Ks	Ka/Ks	Selection pressure
Os01t0125600	OB01G11520	0.810515	3.41052	0.237652	Purifying selection
Os01t0309800	OB01G22770	0.785124	3.45244	0.227411	Purifying selection
Os01t0507700	OB01G26820	1.25788	3.74114	0.336228	Purifying selection
Os01t0719600	OB01G38020	0.824242	4.03254	0.204398	Purifying selection
Os01t0758000	OB01G40430	0.400454	3.26879	0.122508	Purifying selection
Os01t0826000	OB01G44490	0.525204	2.78452	0.188615	Purifying selection
Os01t0927300	OB01G51550	0.254243	1.94525	0.130699	Purifying selection
Os01t0933200	OB01G51980	0.638775	2.87425	0.222241	Purifying selection
Os01t0976300	OB01G55000	0.425042	4.94523	0.0859498	Purifying selection
Os10t0440500	OB10G18740	0.524575	3.42054	0.15336	Purifying selection
Os10t0209700	OB10G14340	0.942453	4.37455	0.21544	Purifying selection
Os11t0147500	OB11G12340	0.225527	3.65724	0.0616659	Purifying selection
Os11t0147500	OB12G12830	0.824521	3.78524	0.217825	Purifying selection
Os12t0144600	OB11G12340	0.397845	2.57575	0.154458	Purifying selection
Os12t0144600	OB12G12830	0.785258	2.57825	0.304571	Purifying selection
Os02t0172600	OB02G14740	0.52274	3.06325	0.170649	Purifying selection
Os02t0196600	OB02G16630	0.697524	3.45855	0.201681	Purifying selection
Os02t0510600	OB02G25760	0.69775	3.04125	0.229429	Purifying selection
Os02t0530100	OB02G26780	0.97857	3.25794	0.300365	Purifying selection
Os02t0584800	OB02G29650	0.852453	4.07528	0.209176	Purifying selection
Os02t0819000	OB02G44150	0.587897	3.89787	0.150825	Purifying selection
Os03t0819400	OB03G45940	0.622543	3.43536	0.181216	Purifying selection
Os03t0120400	OB03G11590	0.876556	1.76575	0.49642	Purifying selection
Os03t0152000	OB03G14100	1.04789	0.96841	1.08208	Positive selection
Os03t0156600	OB03G14330	0.252455	4.45455	0.0566735	Purifying selection
Os03t0383900	OB03G28840	0.696455	1.97858	0.351998	Purifying selection
Os04t0244800	OB04G13930	1.25787	2.78979	0.450885	Purifying selection
Os04t0390100	OB04G17770	0.187587	1.99435	0.0940597	Purifying selection
Os04t0401000	OB04G18340	0.845245	3.71405	0.22758	Purifying selection
Os04t0556000	OB04G28260	0.484406	3.28724	0.147359	Purifying selection
Os04t0590100	OB04G30340	0.872425	3.93453	0.221735	Purifying selection
Os04t0661100	OB04G35300	0.475852	3.92345	0.121284	Purifying selection
Os05t0368600	OB05G21880	0.845452	3.94353	0.21439	Purifying selection
Os05t0534500	OB05G31470	0.584126	3.75787	0.155441	Purifying selection
Os06t0542300	OB06G25350	0.942542	3.74125	0.251933	Purifying selection
Os06t0665800	OB06G31730	0.924272	3.45778	0.267302	Purifying selection
Os07t0671400	OB07G31280	0.847423	3.71523	0.228095	Purifying selection
Os07t0298900	OB07G17850	0.697453	4.82525	0.144542	Purifying selection
Os08t0205400	OB08G16010	0.407783	3.52872	0.115561	Purifying selection

## Sheet: Os_Si
OsHMP_ID	SiHMP_ID	Ka	Ks	Ka/Ks	Selection pressure
Os01t0719600	KQL06752	0.622543	3.43536	0.181216	Purifying selection
Os01t0826000	KQL07531	0.876556	1.76575	0.49642	Purifying selection
Os01t0927300	KQL08432	1.44789	2.96542	0.488259	Purifying selection
Os01t0933200	KQL08486	0.252455	4.45455	0.0566735	Purifying selection
Os01t0595201	KQL05716	0.696455	1.97858	0.351998	Purifying selection
Os01t0125600	KQL04204	1.25787	0.897872	1.40095	Positive selection
Os10t0440500	KQK88934	0.187587	1.99435	0.0940597	Purifying selection
Os10t0537400	KQK90148	0.845245	3.71405	0.22758	Purifying selection
Os12t0144600	KQK99910	0.484406	3.28724	0.147359	Purifying selection
Os02t0510600	KQL29767	0.872425	3.93453	0.221735	Purifying selection
Os02t0172600	KQL28533	1.75852	0.923453	1.90429	Positive selection
Os02t0196600	KQL28281	0.845452	3.94353	0.21439	Purifying selection
Os02t0172600	KQL11044	0.584126	3.75787	0.155441	Purifying selection
Os03t0383900	KQL26757	0.942542	3.74125	0.251933	Purifying selection
Os03t0819400	KQK86446	0.924272	3.45778	0.267302	Purifying selection
Os03t0120400	KQK92886	0.847423	0.715227	1.18483	Positive selection
Os03t0152000	KQK92540	0.697453	4.82525	0.144542	Purifying selection
Os03t0156600	KQK92510	0.407782	3.52872	0.115561	Purifying selection
Os03t0178100	KQK92321	0.875755	3.92457	0.223147	Purifying selection
Os04t0390100	KQL29767	0.044688	0.383925	0.116397	Purifying selection
Os04t0661100	KQL12901	0.862021	0.798985	1.0789	Positive selection
Os04t0556000	KQK98406	0.011137	0.230184	0.048383	Purifying selection
Os04t0590100	KQK98683	1.22687	0.941157	1.30358	Positive selection
Os04t0390100	KQK96980	0.063948	0.334331	0.191274	Purifying selection
Os05t0534500	KQL14597	0.011555	0.228613	0.050525	Purifying selection
Os06t0665800	KQL28533	0.028594	0.393986	0.072577	Purifying selection
Os06t0665800	KQL11044	0.051832	0.481995	0.107536	Purifying selection
Os06t0542300	KQL10916	0.173726	0.930517	0.186698	Purifying selection
Os07t0298900	KQL23287	0.120136	0.681583	0.176261	Purifying selection

## Sheet: Os_Ta
OsHMP_ID	TaHMP_ID	Ka	Ks	Ka/Ks	Selection pressure
Os01t0826000	TraesCS3A02G347400	0.336526	2.65926	0.126549	Purifying selection
Os01t0595201	TraesCS3A02G213500	0.952625	3.96362	0.240342	Purifying selection
Os01t0719600	TraesCS3A02G288300	0.852815	3.55251	0.24006	Purifying selection
Os01t0125600	TraesCS3A02G048000	0.694852	3.69145	0.188233	Purifying selection
Os01t0927300	TraesCS3A02G441500	0.74845	4.02554	0.185925	Purifying selection
Os01t0933200	TraesCS3A02G452100	0.331948	0.371582	0.893337	Purifying selection
Os01t0758000	TraesCS3B02G329600	0.402588	2.58915	0.155491	Purifying selection
Os01t0826000	TraesCS3B02G379100	0.125884	3.64159	0.0345684	Purifying selection
Os01t0595201	TraesCS3B02G244200	0.698544	2.11051	0.330983	Purifying selection
Os01t0719600	TraesCS3B02G322900	0.352058	2.39577	0.14695	Purifying selection
Os01t0933200	TraesCS3B02G489000	1.15459	3.51285	0.328675	Purifying selection
Os01t0927300	TraesCS3B02G475400	0.899584	2.15358	0.417715	Purifying selection
Os01t0125600	TraesCS3B02G034100	0.741415	3.05234	0.2429	Purifying selection
Os01t0758000	TraesCS3D02G295000	0.569841	4.22353	0.134921	Purifying selection
Os01t0826000	TraesCS3D02G341000	0.415584	2.33998	0.177601	Purifying selection
Os01t0927300	TraesCS3D02G434300	0.695482	1.00125	0.694611	Purifying selection
Os01t0595201	TraesCS3D02G216100	0.255458	2.12135	0.120422	Purifying selection
Os01t0719600	TraesCS3D02G288100	0.369481	2.84721	0.129769	Purifying selection
Os01t0125600	TraesCS3D02G031400	0.485295	4.36984	0.111056	Purifying selection
Os01t0933200	TraesCS3D02G444600	0.259875	3.58684	0.0724522	Purifying selection
Os10t0537400	TraesCS1A02G200700	0.96841	0.81574	1.18716	Positive selection
Os10t0440500	TraesCS1A02G139900	0.71541	3.44108	0.207902	Purifying selection
Os10t0537400	TraesCS1B02G215100	0.659581	4.29584	0.153539	Purifying selection
Os10t0440500	TraesCS1B02G157000	0.52841	1.95842	0.269815	Purifying selection
Os10t0440500	TraesCS1D02G139400	0.952851	2.85953	0.33322	Purifying selection
Os10t0537400	TraesCS1D02G204100	0.620517	3.21051	0.193277	Purifying selection
Os11t0147500	TraesCS5A02G133900	0.10521	3.55841	0.0295666	Purifying selection
Os11t0147500	TraesCS5D02G141600	0.206294	1.95284	0.105638	Purifying selection
Os12t0144600	TraesCS5A02G133900	0.36514	1.84125	0.198311	Purifying selection
Os12t0144600	TraesCS5B02G131600	0.45841	3.65851	0.1253	Purifying selection

## Sheet: Os_Zm
OsHMP_ID	ZmHMP_ID	Ka	Ks	Ka/Ks	Selection pressure
Os01t0758000	Zm00001d043403	0.231531	4.31345	0.0536765	Purifying selection
Os01t0927300	Zm00001d042270	0.329418	3.32458	0.0990855	Purifying selection
Os01t0933200	Zm00001d042225	1.20002	0.963558	1.24541	Positive selection
Os01t0719600	Zm00001d043615	0.626315	2.54841	0.245767	Purifying selection
Os01t0125600	Zm00001d040040	0.741851	2.51718	0.294715	Purifying selection
Os01t0309800	Zm00001d040637	0.659258	2.17182	0.303551	Purifying selection
Os01t0595201	Zm00001d011274	0.584712	1.92582	0.303618	Purifying selection
Os01t0826000	Zm00001d012484	0.320551	3.62842	0.0883446	Purifying selection
Os01t0719600	Zm00001d011731	0.255298	1.65985	0.153808	Purifying selection
Os10t0537400	Zm00001d029752	0.564841	4.05258	0.139378	Purifying selection
Os10t0440500	Zm00001d032873	0.895985	0.718485	1.24705	Positive selection
Os10t0440500	Zm00001d014128	0.741552	2.4151	0.307048	Purifying selection
Os11t0147500	Zm00001d023372	0.659854	3.6841	0.179109	Purifying selection
Os12t0144600	Zm00001d023372	0.410562	2.85417	0.143846	Purifying selection
Os02t0510600	Zm00001d025241	0.529418	3.65958	0.144666	Purifying selection
Os02t0172600	Zm00001d053783	0.695817	3.54174	0.196462	Purifying selection
Os02t0819000	Zm00001d051905	1.03651	0.86914	1.19257	Positive selection
Os02t0510600	Zm00001d016577	0.639529	4.02105	0.159045	Purifying selection
Os02t0196600	Zm00001d015829	0.57181	2.91542	0.196133	Purifying selection
Os03t0819400	Zm00001d034634	0.694158	2.33696	0.297035	Purifying selection
Os03t0120400	Zm00001d027405	0.847151	1.95284	0.433805	Purifying selection
Os03t0156600	Zm00001d027720	0.962851	0.896354	1.07419	Positive selection
Os03t0178100	Zm00001d027884	0.418285	3.78916	0.11039	Purifying selection
Os03t0819400	Zm00001d012973	0.595285	2.1415	0.277975	Purifying selection
Os03t0152000	Zm00001d048411	0.52015	2.69528	0.192985	Purifying selection
Os04t0661100	Zm00001d026513	0.65954	2.95281	0.22336	Purifying selection
Os04t0390100	Zm00001d025241	0.51189	3.84849	0.133011	Purifying selection
Os04t0556000	Zm00001d002708	0.5412	3.65298	0.148153	Purifying selection
Os04t0590100	Zm00001d002496	0.96114	4.20653	0.228488	Purifying selection
Os04t0244800	Zm00001d004138	0.85258	2.68841	0.317132	Purifying selection
Os04t0390100	Zm00001d016577	0.659285	2.41852	0.272598	Purifying selection
Os05t0368600	Zm00001d042225	0.52174	2.54841	0.204731	Purifying selection
Os05t0534500	Zm00001d011731	0.99236	0.874415	1.13488	Positive selection
Os06t0542300	Zm00001d046169	0.896515	1.85296	0.483828	Purifying selection
Os07t0671400	Zm00001d007130	0.658941	3.95285	0.1667	Purifying selection
Os07t0298900	Zm00001d019446	0.569474	2.74842	0.207201	Purifying selection
Os07t0671400	Zm00001d022474	0.41052	2.74953	0.149306	Purifying selection

## Sheet: Os_At
OsHMP_ID	AtHMP_ID	Ka	Ks	Ka/Ks	Selection pressure
Os03t0819400	AT5G02600	1.00893	0.976206	1.03352	Positive selection

## Sheet: Os_Br
OsHMP_ID	BrHMP_ID	Ka	Ks	Ka/Ks	Selection pressure
Os01t0976300	Bra035681	0.826921	0.69528	1.18934	Positive selection

## Sheet: Os_Cs
OsHMP_ID	CsHMP_ID	Ka	Ks	Ka/Ks	Selection pressure
Os03t0819400	KGN54216	0.85841	1.02658	0.836181	Purifying selection
Os07t0671400	KGN57102	0.96258	0.84125	1.14423	Positive selection

## Sheet: Os_Gm
OsHMP_ID	GmHMP_ID	Ka	Ks	Ka/Ks	Selection pressure
Os01t0826000	KRH14890	1.16302	0.86524	1.34416	Positive selection
Os01t0826000	KRH73234	0.597413	2.69102	0.222002	Purifying selection
Os03t0383900	KRG97609	0.365101	3.87161	0.0943021	Purifying selection
Os03t0178100	KRH52252	1.09521	0.92201	1.18785	Positive selection
Os04t0390100	KRH59801	0.785244	3.64851	0.215223	Purifying selection
Os04t0390100	KRH41116	0.649967	2.69417	0.241249	Purifying selection
Os05t0368600	KRG96418	1.15216	0.95412	1.20756	Positive selection
Os05t0368600	KRH68159	0.69521	2.69521	0.257943	Purifying selection
Os07t0671400	KRH02248	0.587411	3.44986	0.170271	Purifying selection
Os07t0671400	KRH50862	0.695485	4.84713	0.143484	Purifying selection

[truncated: 2 more sheets: Os_Gr, Os_St]
